# Supplementary material for: A Genomewide Functional Network for the Laboratory Mouse
Source: PLoS Comput Biol. 2008 Sep 26;4(9):e1000165. doi: 10.1371/journal.pcbi.1000165 (PMC2527685; doi:10.1371/journal.pcbi.1000165)
Supplement: Dataset S2 — Expert curation for a selected set of gene function predictions based on the network. (0.07 MB XLS) [file pcbi.1000165.s002.xls]

## Sheet: Sheet1
BIN	MGI_ID	Gene Symbol	GO_ID	GO term	would be annotated	likely to be true	unclear	seems unlikely	very unlikely or not true	already annotated	reasons
	MGI:95688	Gdf5	GO:0001501	skeletal development	X						IMP|MGI:1855972|J:19596
	MGI:95688	Gdf5	GO:0007368	determination of left/right symmetry				X			dorsal ventral and proximal distal have been shown by IMP
	MGI:95688	Gdf5	GO:0007369	gastrulation					X		I find no evidence for this.
	MGI:95688	Gdf5	GO:0007498	mesoderm development					X
	MGI:95688	Gdf5	GO:0009799	determination of symmetry				X			As in above, evidence points to this gene product in patterning along an axis, but not in symmetry or asymmetry.
	MGI:95688	Gdf5	GO:0009855	determination of bilateral symmetry				X
	MGI:95688	Gdf5	GO:0009968	negative regulation of signal transduction
	MGI:95688	Gdf5	GO:0017015	regulation of transforming growth factor beta receptor signaling pathway					X		In GO BMPR pathways and TGFBR pathways are sibs. Although they are realted families of proteins, the pathways they describe are separate.
	MGI:95688	Gdf5	GO:0030510	regulation of BMP signaling pathway				X			Evidence (IGI, J:59282) shows it is a ligand for a BMPR, so although not entirely accurate, this call is not unreasonable.
	MGI:95688	Gdf5	GO:0030514	negative regulation of BMP signaling pathway				X			Evidence (IGI, J:59282) shows it is a ligand for a BMPR so if any interpretation of regulation is made, it would be postitive regulation.
	MGI:95688	Gdf5	GO:0040007	growth	X						The annotation would probably be made to a more information-rich term, but the product of this gene is involved in cartilage growth in the joints.
	MGI:96669	Kcn3	GO:0001505	regulation of neurotransmitter levels	X						J:101270|IMP
	MGI:96669	Kcn3	GO:0007269	neurotransmitter secretion	X						J:101270|IMP
	MGI:96669	Kcn3	GO:0045055	regulated secretory pathway	X						J:101270|IMP
	MGI:2149820	Nans	GO:0001755	neural crest cell migration		X					N-acetylneuraminic acid (sialic acid) is an important component of cell surface receptors and is found on subsets of NC cells.
	MGI:2149820	Nans	GO:0042551	neuron maturation		X					N-acetylneuraminic acid (sialic acid) is an important component of cell surface receptors. I could envision that it is involved in neuron maturation.
	MGI:2443878	Slc4a7	GO:0006885	regulation of pH	X						IMP|J:118990
	MGI:2443878	Slc4a7	GO:0015698	inorganic anion transport	X						IMP|J:118990
	MGI:2139434	Mylk2	GO:0006936	muscle contraction	X						IMP|J:104384
	MGI:2139434	Mylk2	GO:0006941	striated muscle contraction	X						IMP|J:104384
	MGI:2139434	Mylk2	GO:0030832	regulation of actin filament length				X
	MGI:1346875	Map3k4	GO:0065009	regulation of a molecular function					x		this term is a grouping term needed for is_a completeness, and should never be used for annotation.
	MGI:2448355	Hist2h3c1	GO:0065004	protein-DNA complex assembly					x		A histone is IN a protein DNA complex, but I would not call it involved in the process of assembly
	MGI:2448436	Hist1h4j	GO:0065004	protein-DNA complex assembly					x		as above
	MGI:2448432	Hist1h4i	GO:0065004	protein-DNA complex assembly					x		as above
	MGI:2448375	Hist1h2ba	GO:0065004	protein-DNA complex assembly					x		as above
	MGI:1349430	Eif2s3y	GO:0065004	protein-DNA complex assembly			x		no		IEA to translation factor; no lit.
	MGI:2448285	Hist1h2aa	GO:0065004	protein-DNA complex assembly					x		A histone is IN a protein DNA complex, but I would not call it involved in the process of assembly
	MGI:2448306	Hist1h2ab	GO:0065004	protein-DNA complex assembly					x		as above
	MGI:1922442	Hist3h2bb	GO:0065004	protein-DNA complex assembly					x		as above
	MGI:2448355	Hist2h3c1	GO:0065004	protein-DNA complex assembly					x		as above
	MGI:2448436	Hist1h4j	GO:0065004	protein-DNA complex assembly					x		as above
	MGI:2448432	Hist1h4i	GO:0065004	protein-DNA complex assembly					x		as above
	MGI:2181667	Bbc3	GO:0065002	intracellular protein transport across a membrane				x
	MGI:2441671	Gpr81	GO:0065002	intracellular protein transport across a membrane			x				Ifligand is a protein, maybe
	MGI:2147319	Svil	GO:0065002	intracellular protein transport across a membrane			x				IEApredict involvment in actin / membrane cytoskeleton
	MGI:97847	Raf1	GO:0065002	intracellular protein transport across a membrane				x			no membrane annotations; kinase
	MGI:1352757	Iqgap1	GO:0055002	striated muscle cell development				x
	MGI:1923847	Gins4,	GO:0055002	striated muscle cell development			x				binds protein and is in nucleus and cyto
	MGI:1923847	Gins4,	GO:0055001	muscle cell development			x				binds protein and is in nucleus and cyto
	MGI:2441671	Gpr81,	GO:0051924	regulation of calcium ion transport			x				maybe
	MGI:1349479	Chst4	GO:0002274	myeloid leukocyte activation					X		This is an enzyme which modifies carbohydrate chains attached to proteins. A secondary effect of this is control of lymphocyte homing dependent upon recognition of particular glycosylation motifs generated by the action of this enzyme and seen on cell surface glycoproteins. Cellular activation does result from lymphocyte recognition of these motifs, but not from any direct binding, enzymatic acti…
	MGI:1349479	Chst4	GO:0002478	antigen processing and presentation of exogenous peptide antigen				X			No literature evidence even hinting at a role here. The type of glycosylation modification done by Chst4 has not been shown or investigated for any role in antigen presentation.
	MGI:1349479	Chst4	GO:0002495	antigen processing and presentation of peptide antigen via MHC class II				X			No literature evidence even hinting at a role here. The type of glycosylation modification done by Chst4 has not been shown or investigated for any role in antigen presentation.
	MGI:1349479	Chst4	GO:0002504	antigen processing and presentation of peptide or polysaccharide antigen via MHC class II				X			No literature evidence even hinting at a role here. The type of glycosylation modification done by Chst4 has not been shown or investigated for any role in antigen presentation.
	MGI:1349479	Chst4	GO:0006909	phagocytosis					X		No literature evidence for this. This enzyme could potential modify glycosylation motifs that would later be recognized by a receptor on a phagocytic cell, but this would be an upstream effect, not a direct effect.
	MGI:1349479	Chst4	GO:0006911	phagocytosis, engulfment					X		No literature evidence for this. This enzyme could potential modify glycosylation motifs that would later be recognized by a receptor on a phagocytic cell, but this would be an upstream effect, not a direct effect.
	MGI:1349479	Chst4	GO:0007009	plasma membrane organization and biogenesis					X		This is an enzyme which modifies carbohydrate chains attached to proteins. It has no known role in lipid synthesis or trafficking, and given its known enzymatic activity, it is unlikely to have such a role.
	MGI:1349479	Chst4	GO:0019884	antigen processing and presentation of exogenous antigen				X			No literature evidence even hinting at a role here. The type of glycosylation modification done by Chst4 has not been shown or investigated for any role in antigen presentation.
	MGI:1349479	Chst4	GO:0019886	antigen processing and presentation of exogenous peptide antigen via MHC class II				X			No literature evidence even hinting at a role here. The type of glycosylation modification done by Chst4 has not been shown or investigated for any role in antigen presentation.
	MGI:1349479	Chst4	GO:0030100	regulation of endocytosis					X		No literature evidence for this. This enzyme could potential modify glycosylation motifs that would later be recognized by a receptor triggering endocytosis, but this would not be a direct regulation event.
	MGI:1349479	Chst4	GO:0045807	positive regulation of endocytosis					X		No literature evidence for this. This enzyme could potential modify glycosylation motifs that would later be recognized by a receptor triggering endocytosis, but this would not be a direct regulation event.
	MGI:1349479	Chst4	GO:0048002	antigen processing and presentation of peptide antigen				X			No literature evidence even hinting at a role here. The type of glycosylation modification done by Chst4 has not been shown or investigated for any role in antigen presentation.
	MGI:1349479	Chst4	GO:0050764	regulation of phagocytosis					X		No literature evidence for this. This enzyme could potential modify glycosylation motifs that would later be recognized by a receptor on a phagocytic cell, but this would be an upstream effect, not a direct regulation event.
	MGI:1349479	Chst4	GO:0050766	positive regulation of phagocytosis					X		No literature evidence for this. This enzyme could potential modify glycosylation motifs that would later be recognized by a receptor on a phagocytic cell, but this would be an upstream effect, not a direct regulation event.
	MGI:1349479	Chst4	GO:0051050	positive regulation of transport				X			This is an enzyme which modifies carbohydrate chains attached to proteins. It has no known role direct role in transport, but this is such a broad category I can't role it out completely.
	MGI:109355	Stx1a	GO:0006887	exocytosis	X						This is a long-demostrated role for Stx1a (PMID:7690687) -- unsure if mouse gp-specific data exists.
	MGI:109355	Stx1a	GO:0006944	membrane fusion	X						Members of this protein family are involved in promoting membrane fusion events. Not sure if direct evidence for mouse Stx1a exists, but at least an ISS is possible.
	MGI:109355	Stx1a	GO:0016079	synaptic vesicle exocytosis	X						This is a long-demostrated role for Stx1a (PMID:7690687) -- unsure if mouse gp-specific data exists.
	MGI:109355	Stx1a	GO:0017156	calcium ion-dependent exocytosis	X						Stated in abstract of PMID: 16123365 -- unsure if mouse gp-specific data exists.
	MGI:109355	Stx1a	GO:0048489	synaptic vesicle transport	X						This is a long-demostrated role for Stx1a (PMID:7690687) -- unsure if mouse gp-specific data exists.
	MGI:109355	Stx1a	GO:0051650	establishment of vesicle localization	X						Related term to GO:0048489 -- would coannotate.
	MGI:107457	Mzf1	GO:0002200	somatic diversification of immune receptors					X		This is contra-indicated by PMID:11445537, the KO mouse paper for the gene, which shows normal lymphocyte development in the KO, which would not be expected a gene involved in this process. Similarly, published expression data say this gene is expressed primarily in myeloid, not lymphocyte lineages.
	MGI:107457	Mzf1	GO:0002377	immunoglobulin production					X		No evidence in literature; see above comment.
	MGI:107457	Mzf1	GO:0002440	production of molecular mediator of immune response				X			No evidence in literature; gene has been shown to control cell proliferation of myeloid cells.
	MGI:107457	Mzf1	GO:0002562	somatic diversification of immune receptors via germline recombination within a single locus					X		This is contra-indicated by PMID:11445537, the KO mouse paper for the gene, which shows normal lymphocyte development in the KO, which would not be expected a gene involved in this process. Similarly, published expression data say this gene is expressed primarily in myeloid, not lymphoid lineages.
	MGI:107457	Mzf1	GO:0002761	regulation of myeloid leukocyte differentiation			X				This is contra-indicated by PMID:11445537, the KO mouse paper for the gene, which states directly that this gene controls proliferation of myeloid cells, but not differentiation of myeloid lineages. However a couple earlier papers doing in vitro studies in human and mouse systems suggest it may have a role in differentiation of specific myeloid lineages.
	MGI:107457	Mzf1	GO:0007050	cell cycle arrest			X				Depends how broadly one interprets the data of PMID:11445537 and the definition of GO:0007050.
	MGI:107457	Mzf1	GO:0007093	mitotic checkpoint				X			Seems unlikely as Mzf1 is thought to be a transcription factor.
	MGI:107457	Mzf1	GO:0016444	somatic cell DNA recombination					X		This is contra-indicated by PMID:11445537, the KO mouse paper for the gene, which shows normal lymphocyte development in the KO, which would not be expected a gene involved in this process. Similarly, published expression data say this gene is expressed primarily in myeloid, not lymphoid lineages.
	MGI:107457	Mzf1	GO:0016445	somatic diversification of immunoglobulins					X		This is contra-indicated by PMID:11445537, the KO mouse paper for the gene, which shows normal lymphocyte development in the KO, which would not be expected a gene involved in this process. Similarly, published expression data say this gene is expressed primarily in myeloid, not lymphoid lineages.
	MGI:107457	Mzf1	GO:0016447	somatic recombination of immunoglobulin gene segments					X		This is contra-indicated by PMID:11445537, the KO mouse paper for the gene, which shows normal lymphocyte development in the KO, which would not be expected a gene involved in this process. Similarly, published expression data say this gene is expressed primarily in myeloid, not lymphoid lineages.
	MGI:107457	Mzf1	GO:0045577	regulation of B cell differentiation					X		This is contra-indicated by PMID:11445537, the KO mouse paper for the gene, which shows normal lymphocyte development in the KO, which would not be expected a gene involved in this process. Similarly, published expression data say this gene is expressed primarily in myeloid, not lymphoid lineages.
	MGI:107457	Mzf1	GO:0045786	negative regulation of progression through cell cycle			X				Depends how broadly one interprets the data of PMID:11445537 and the definition of GO:0007050.
	MGI:107457	Mzf1	GO:0051047	positive regulation of secretion				X			Seems unlikely as Mzf1 is thought to be a transcription factor.
	MGI:95499	Fcgr2b	GO:0002699	positive regulation of immune effector process					X		If anything, we would expect negative regulation terms for this gene, due to the "ITIM" motif in its cytoplasmic tail and its known negative regulation of cell activation.
	MGI:95499	Fcgr2b	GO:0002705	positive regulation of leukocyte mediated immunity					X		If anything, we would expect negative regulation terms for this gene, due to the "ITIM" motif in its cytoplasmic tail and its known negative regulation of cell activation.
	MGI:95499	Fcgr2b	GO:0002708	positive regulation of lymphocyte mediated immunity					X		If anything, we would expect negative regulation terms for this gene, due to the "ITIM" motif in its cytoplasmic tail and its known negative regulation of cell activation.
	MGI:95499	Fcgr2b	GO:0002761	regulation of myeloid leukocyte differentiation		X					Supported by PMID:15843524, but would annotate to a more specific term in practice.
	MGI:95499	Fcgr2b	GO:0002821	positive regulation of adaptive immune response					X		If anything, we would expect negative regulation terms for this gene, due to the "ITIM" motif in its cytoplasmic tail and its known negative regulation of cell activation.
	MGI:95499	Fcgr2b	GO:0002824	positive regulation of adaptive immune response based on somatic recombination of immune receptors built from immunoglobulin superfamily domains					X		If anything, we would expect negative regulation terms for this gene, due to the "ITIM" motif in its cytoplasmic tail and its known negative regulation of cell activation.
	MGI:95499	Fcgr2b	GO:0045639	positive regulation of myeloid cell differentiation				X			Contraindicated by PMID:15843524, but conceivably possible.
	MGI:95499	Fcgr2b	GO:0045670	regulation of osteoclast differentiation				X			No evidence in literature.
	MGI:95499	Fcgr2b	GO:0046850	regulation of bone remodeling				X			No evidence in literature.
	MGI:95499	Fcgr2b	GO:0046851	negative regulation of bone remodeling				X			No evidence in literature.
	MGI:1888506	Retn	GO:0006006	glucose metabolic process	X						Supported by PMID:17065346, although a regulation term would be better.
	MGI:1888506	Retn	GO:0006090	pyruvate metabolic process				X			No evidence in literature.
	MGI:1888506	Retn	GO:0006638	neutral lipid metabolic process			X				PMID:15358276 and other suggest indirect effects on lipid metabolism -- not sure if this is the correct term to annotate to.
	MGI:1888506	Retn	GO:0006639	acylglycerol metabolic process			X				PMID:15358276 and other suggest indirect effects on lipid metabolism -- not sure if this is the correct term to annotate to.
	MGI:1888506	Retn	GO:0006641	triacylglycerol metabolic process			X				PMID:15358276 and other suggest indirect effects on lipid metabolism -- not sure if this is the correct term to annotate to.
	MGI:1888506	Retn	GO:0006662	glycerol ether metabolic process				X			No evidence in literature.
	MGI:1888506	Retn	GO:0016051	carbohydrate biosynthetic process		X					A more specific regulation term would be a better choice (PMID: 15684405).
	MGI:1888506	Retn	GO:0019319	hexose biosynthetic process		X					A regulation term would be a better choice (PMID: 15684405).
	MGI:1888506	Retn	GO:0042593	glucose homeostasis	X						Supported by PMID:17065346.
	MGI:1888506	Retn	GO:0046165	alcohol biosynthetic process		X					A more specific regulation term would be a better choice (PMID: 15684405).
	MGI:1888506	Retn	GO:0046364	monosaccharide biosynthetic process		X					A more specific regulation term would be a better choice (PMID: 15684405).
	MGI:1888506	Retn	GO:0046486	glycerolipid metabolic process				X			No evidence in literature.
	MGI:1888506	Retn	GO:0051241	negative regulation of multicellular organismal process				X			Term is too non-specific.
	MGI:1343461	Ecel1	GO:0006956	complement activation				X			No evidence in literature. Gene is at least a peptidase.
	MGI:1343461	Ecel1	GO:0007613	memory					X		No evidence in literature.
	MGI:1343461	Ecel1	GO:0048168	regulation of neuronal synaptic plasticity					X		No evidence in literature.
	MGI:1343461	Ecel1	GO:0002541	activation of plasma proteins during acute inflammatory response				X			No evidence in literature. Gene is at least a peptidase.
